# Supplementary material for: SEA-Rice-Ci10: High-resolution Mapping of Rice Cropping Intensity and Harvested Area Across Southeast Asia using the Integration of Sentinel-1 and Sentinel-2 Data
Source: Copernicus journal article supplement (doi:10.5194/essd-2024-90), 2024-03-25
Supplement: Supplementary file 1 [file essd-2024-90-supplement.pdf]

1 **SEA-Rice-Ci10: High-resolution Mapping of Rice Cropping Intensity and Harvested Area**

2 **Across Southeast Asia using the Integration of Sentinel-1 and Sentinel-2 Data**

3 **(Supplementary Materials)**

4  
5 Frisa Irawan Ginting<sup>1</sup>, Rudiyanto<sup>1,8\*</sup>, Fatchurrachman<sup>1</sup>, Ramisah Mohd Shah<sup>1</sup>, Norhidayah Che  
6 Soh<sup>1</sup>, Sunny Goh Eng Giap<sup>2</sup>, Dian Fiantis<sup>3</sup>, Budi Indra Setiawan<sup>4</sup>, Sam Schiller<sup>5,8</sup>, Aaron Davitt<sup>6,8</sup>,  
7 Budiman Minasny<sup>7\*</sup>

8  
9 <sup>1</sup>Program of Crop Science, Faculty of Fisheries and Food Science, Universiti Malaysia Terengganu, Kuala Nerus  
10 21030, Terengganu, Malaysia

11 <sup>2</sup>Program of Environmental Technology, Faculty of Ocean Engineering Technology and Informatics, Universiti  
12 Malaysia Terengganu, 21030, Kuala Nerus, Terengganu, Malaysia

13 <sup>3</sup>Department of Soil Science, Faculty of Agriculture, Andalas University, Kampus Limau Manis, Padang 25163,  
14 Indonesia

15 <sup>4</sup>Department of Civil and Environmental Engineering, IPB University, Bogor, 16680, Indonesia

16 <sup>5</sup>Carbon Yield, Chicago IL, 60660 USA

17 <sup>6</sup>WattTime, Oakland CA, 94609 USA

18 <sup>7</sup>School of Life and Environmental Sciences, The University of Sydney, 1 Central Avenue, The Australian Technology  
19 Park, Eveleigh, NSW 2015, Australia

20 <sup>8</sup>Climate TRACE, Global coalition – USA and Malaysia

21  
22 *Correspondence to:* Rudiyanto ([rudiyanto@umt.edu.my](mailto:rudiyanto@umt.edu.my)) and Budiman Minasny ([budiman.minasny@sydney.edu.au](mailto:budiman.minasny@sydney.edu.au))

23  
24 Rudiyanto and Budiman Minasny contributed equally to this work.

25

26

27

28

29

30

31 **Table S1.** Percentage of Paddy Rice Harvested Area in Southeast Asia Countries from this study.

| <b>Country</b> | <b>Total harvested area<br/>from This study<br/>(x 10<sup>3</sup> ha)</b> | <b>Percentage (%)</b> |
|----------------|---------------------------------------------------------------------------|-----------------------|
| Indonesia      | 8,452.02                                                                  | 19.69                 |
| Timor-Leste    | 10.95                                                                     | 0.03                  |
| Malaysia       | 485.46                                                                    | 1.13                  |
| Philippines    | 3,289.13                                                                  | 7.66                  |
| Vietnam        | 6,247.96                                                                  | 14.56                 |
| Cambodia       | 3,923.99                                                                  | 9.14                  |
| Laos           | 838.14                                                                    | 1.95                  |
| Thailand       | 11,233.21                                                                 | 26.18                 |
| Myanmar        | 8,434.25                                                                  | 19.65                 |
| <b>Total</b>   | <b>42,915.11</b>                                                          | <b>100</b>            |

32

33 **Table S2.** Percentage of Paddy Rice Growing Area in Southeast Asia Countries from this study  
34 and NESEA-10m.

| <b>Country</b> | <b>Total rice<br/>growing area<br/>(x 10<sup>3</sup> ha)</b> | <b>Percentage<br/>(%)</b> | <b>NESEA-Rice10m<br/>growing area<br/>(x 10<sup>3</sup> ha)</b> | <b>Percentage<br/>(%)</b> |
|----------------|--------------------------------------------------------------|---------------------------|-----------------------------------------------------------------|---------------------------|
| Indonesia      | 4,359                                                        | 15.28                     | 3,032                                                           | 23.49                     |
| Timor-Leste    | 11                                                           | 0.04                      | 4                                                               | 0.03                      |
| Malaysia       | 243                                                          | 0.85                      | 251                                                             | 1.94                      |
| Philippines    | 1,645                                                        | 5.77                      | 1,112                                                           | 8.62                      |
| Vietnam        | 3,122                                                        | 10.94                     | 2,295                                                           | 17.78                     |
| Cambodia       | 3,150                                                        | 11.04                     | 1,198                                                           | 9.28                      |
| Laos           | 787                                                          | 2.76                      | 161                                                             | 1.25                      |
| Thailand       | 9,159                                                        | 32.10                     | 1,454                                                           | 11.27                     |
| Myanmar        | 6,053                                                        | 21.22                     | 3,399                                                           | 26.34                     |
| <b>Total</b>   | <b>28,529</b>                                                | <b>100</b>                | <b>12,906</b>                                                   | <b>100</b>                |

35

36

37

38

39

40

41

42 **Table S3.** The relative discrepancy between paddy rice growing area of this study and NESEA-  
 43 Rice10m and 20mRice-MSEAsia.

| Country      | Total rice growing area | NESEA-Rice10m growing area | 20mRice-MSEAsia growing area | Relative discrepancy (%) between |             |
|--------------|-------------------------|----------------------------|------------------------------|----------------------------------|-------------|
|              | (x 10 <sup>3</sup> ha)* | (x 10 <sup>3</sup> ha)     | (x 10 <sup>3</sup> ha)       | (a) and (b)                      | (a) and (c) |
|              | (a)                     | (b)                        | (c)                          |                                  |             |
| Indonesia    | 4,359                   | 3,032                      | NA                           | 30.44                            | NA          |
| Timor Leste  | 11                      | 4                          | NA                           | 63.64                            | NA          |
| Malaysia     | 243                     | 251                        | NA                           | -3.29                            | NA          |
| Philippines  | 1,645                   | 1,112                      | NA                           | 32.40                            | NA          |
| Vietnam      | 3,122                   | 2,295                      | 3,313                        | 26.49                            | -6.12       |
| Cambodia     | 3,150                   | 1,198                      | 2,820                        | 61.96                            | 10.47       |
| Laos         | 787                     | 161                        | 853                          | 79.54                            | -8.39       |
| Thailand     | 9,159                   | 1,454                      | 12,812                       | 84.12                            | -39.88      |
| Myanmar      | 6,053                   | 3,399                      | 5,354                        | 43.85                            | 11.55       |
| <b>Total</b> | <b>28,527</b>           | <b>12,907</b>              |                              | <b>54.75</b>                     |             |

44

45

46

47

48

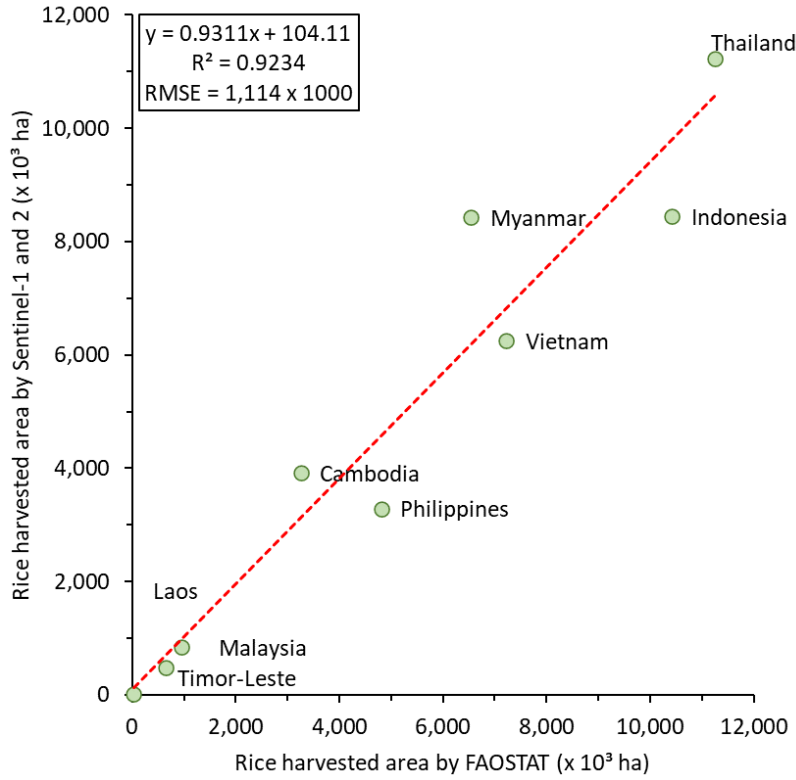

49

50 **Figure S1.** Comparison of Paddy Rice Harvested Area from our study and FAOSTAT 2021 data  
 51 in Southeast Asia Countries.

52

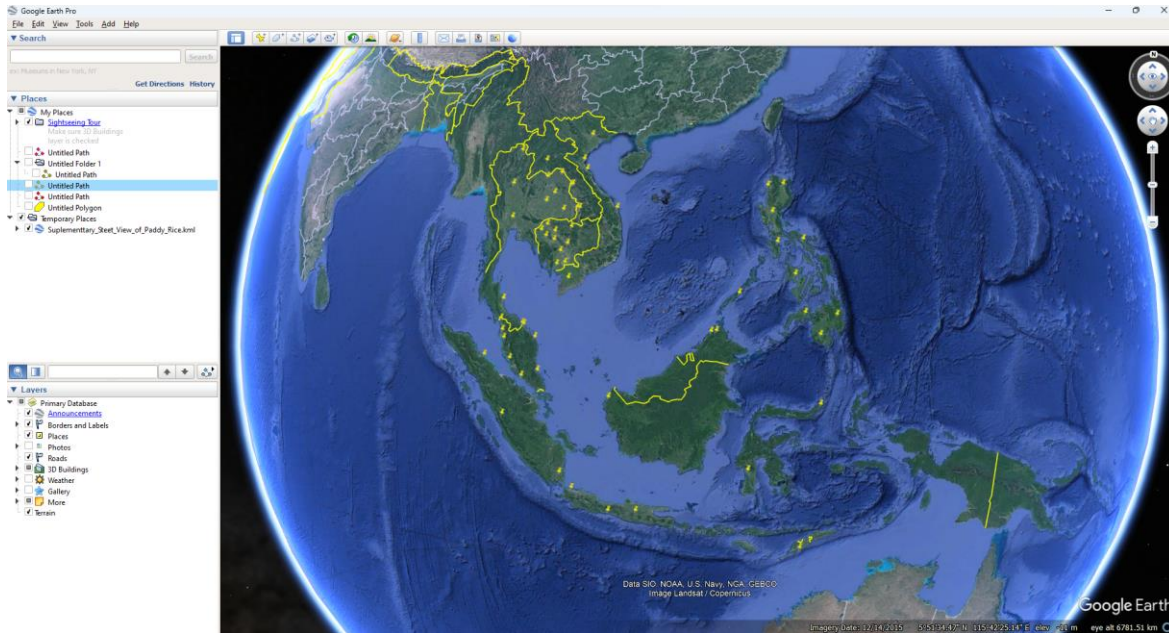

53

54 **Figure S2.** Point observation of Paddy Rice in Southeast Asia on © Google Earth in KML file.

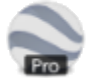

Suplementary\_Steet\_  
View\_of\_Paddy\_Rice.kr

55

56

57 **Table S4.** Paddy Rice in Southeast Asia from © Google Street View imagery data

| Country   | Longitude   | Latitude    | Figure                                                                               |
|-----------|-------------|-------------|--------------------------------------------------------------------------------------|
| Indonesia | 99.01479993 | 3.595400348 |    |
| Indonesia | 100.6859553 | -0.7922225  |   |
| Indonesia | 105.3989329 | -4.93001205 |  |
| Indonesia | 106.3672811 | -6.07022163 |  |

| Country   | Longitude   | Latitude    | Figure                                                                               |
|-----------|-------------|-------------|--------------------------------------------------------------------------------------|
| Indonesia | 109.2402942 | -7.65911943 |    |
| Indonesia | 111.3780629 | -7.49826424 |    |
| Indonesia | 124.9221958 | 1.299268945 |   |
| Indonesia | 119.702954  | -3.82683575 |  |
| Indonesia | 109.0725447 | 1.134228259 |  |

| Country   | Longitude   | Latitude    | Figure                                                                               |
|-----------|-------------|-------------|--------------------------------------------------------------------------------------|
| Indonesia | 124.2340546 | -10.1040428 |    |
| Malaysia  | 100.2341456 | 6.429452855 |    |
| Malaysia  | 100.4194023 | 5.583964756 |   |
| Malaysia  | 100.5887379 | 4.985093165 |  |
| Malaysia  | 101.167579  | 3.487900869 |  |

| Country  | Longitude   | Latitude    | Figure                                                                               |
|----------|-------------|-------------|--------------------------------------------------------------------------------------|
| Malaysia | 102.1857525 | 2.240226915 |    |
| Malaysia | 102.158006  | 6.12328591  |    |
| Malaysia | 103.1343191 | 5.222476556 |   |
| Malaysia | 103.4710105 | 2.750777274 |  |
| Malaysia | 116.456845  | 6.388001183 |  |



| Country  | Longitude   | Latitude    | Figure                                                                               |
|----------|-------------|-------------|--------------------------------------------------------------------------------------|
| Malaysia | 116.841941  | 6.455242827 |    |
| Thailand | 102.7388647 | 17.56724433 |    |
| Thailand | 103.8845584 | 17.91169093 |   |
| Thailand | 104.4585999 | 15.00107596 |  |
| Thailand | 102.9334704 | 15.6241443  |  |

| Country  | Longitude   | Latitude    | Figure                                                                               |
|----------|-------------|-------------|--------------------------------------------------------------------------------------|
| Thailand | 103.5347287 | 16.27858118 |    |
| Thailand | 100.1222702 | 19.71767444 |    |
| Thailand | 99.87483007 | 16.94460257 |   |
| Thailand | 100.2484223 | 14.25356076 |  |
| Thailand | 100.2998385 | 7.948425495 |  |

| Country     | Longitude   | Latitude    | Figure                                                                               |
|-------------|-------------|-------------|--------------------------------------------------------------------------------------|
| Thailand    | 102.0446077 | 6.197305243 |    |
| Philippines | 121.6318658 | 17.80729703 |    |
| Philippines | 120.7931634 | 15.56557685 |   |
| Philippines | 121.2159232 | 13.27876624 |  |
| Philippines | 123.2199645 | 13.59780772 |  |

| Country     | Longitude   | Latitude    | Figure                                                                               |
|-------------|-------------|-------------|--------------------------------------------------------------------------------------|
| Philippines | 120.4152337 | 17.61544304 |    |
| Philippines | 122.6309367 | 10.89980732 |    |
| Philippines | 118.4257368 | 9.310586175 |   |
| Philippines | 123.4670051 | 8.080947125 |  |
| Philippines | 125.9286177 | 8.024919419 |  |

| Country     | Longitude   | Latitude    | Figure                                                                               |
|-------------|-------------|-------------|--------------------------------------------------------------------------------------|
| Philippines | 124.682016  | 6.486463055 |    |
| Cambodia    | 105.0390846 | 10.93035239 |    |
| Cambodia    | 104.392425  | 10.7853001  |   |
| Cambodia    | 104.5873266 | 11.7904319  |  |
| Cambodia    | 105.0930191 | 12.3825402  |  |

| Country  | Longitude   | Latitude    | Figure                                                                               |
|----------|-------------|-------------|--------------------------------------------------------------------------------------|
| Cambodia | 105.2610298 | 13.67147785 |    |
| Cambodia | 103.279965  | 12.89624009 |    |
| Cambodia | 103.9765528 | 12.61861772 |   |
| Cambodia | 102.8305285 | 13.33648317 |  |
| Cambodia | 103.2720483 | 13.78196331 |  |

| Country  | Longitude   | Latitude    | Figure                                                                               |
|----------|-------------|-------------|--------------------------------------------------------------------------------------|
| Cambodia | 103.9776023 | 13.2874801  |    |
| Vietnam  | 105.4245093 | 9.804014279 |    |
| Vietnam  | 106.0066923 | 21.15429258 |   |
| Vietnam  | 108.7417994 | 15.31151373 |  |
| Vietnam  | 105.9667656 | 18.29433381 |  |

| Country | Longitude   | Latitude    | Figure                                                                             |
|---------|-------------|-------------|------------------------------------------------------------------------------------|
| Vietnam | 105.6010333 | 19.09373115 |  |

58

59
